# Supplementary material for: Modelling strategies for the covalent functionalization of 2D phosphorene
Source: PubMed Central journal article supplement (PMC6301276; doi:10.1039/c8dt03628d), 2018-11-12
Supplement: DT-047-C8DT03628D-s001.pdf [file DT-047-C8DT03628D-s001.pdf]

# **Modelling Strategies for the Covalent Functionalization of 2D Phosphorene**

Andrea Ienco,\* Gabriele Manca,\* Maurizio Peruzzini and Carlo Mealli

*Istituto di Chimica dei Composti Organometallici – Consiglio Nazionale delle Ricerche (CNR-  
ICCOM), Via Madonna del Piano 10, 50019, Sesto Fiorentino (FI), Italy.*

## Supporting Information

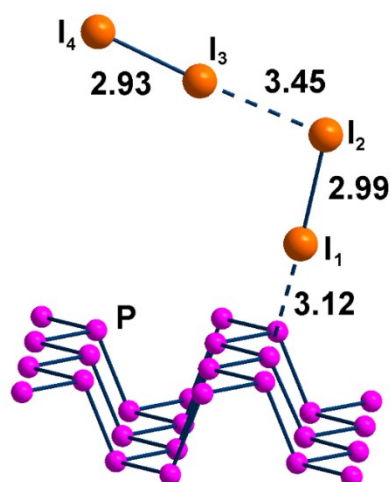

**Figure S1.** Optimized structure of  $P_n \cdot 2I_2$  adduct.

**Table S1.** Geometric and energetic values of the optimized  $P_{\text{pyram}} \cdot 2I_2$  species. The BE values are relative to formation of the adducts between  $P_{\text{pyram}}$  and two  $I_2$  molecules. The  $[P_{\text{pyram}}I]^+ [I_3]^-$  ion pair formation appears plausible only for the stronger phosphine donors.

|                        | $P_{\text{pyram}} \cdot 2I_2$ adduct |                                    |                                      |                                    | BE (eV) |
|------------------------|--------------------------------------|------------------------------------|--------------------------------------|------------------------------------|---------|
|                        | P-I <sub>1</sub> (Å)                 | I <sub>1</sub> -I <sub>2</sub> (Å) | I <sub>2</sub> ···I <sub>3</sub> (Å) | I <sub>3</sub> -I <sub>4</sub> (Å) |         |
| $(CH_3)_3P \cdot 2I_2$ | 2.59                                 | 3.22                               | 3.30                                 | 3.01                               | -1.52   |
| $P_3P \cdot 2I_2$      | 2.68                                 | 3.13                               | 3.34                                 | 2.98                               | -1.20   |
| $P_n \cdot 2I_2$       | 3.12                                 | 2.99                               | 3.45                                 | 2.93                               | -0.32   |
| $P_4 \cdot 2I_2$       | 3.19                                 | 2.95                               | 3.50                                 | 2.92                               | -0.28   |

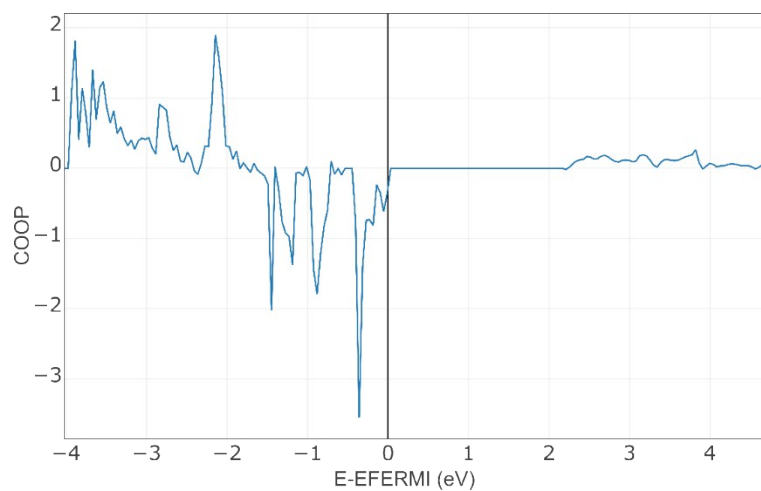

**Figure S2.** Crystal Overlap Orbital Population (COOP) between Au P<sub>3</sub> atoms in ClAu ( $\eta^1$ -P<sub>n</sub>) adduct.

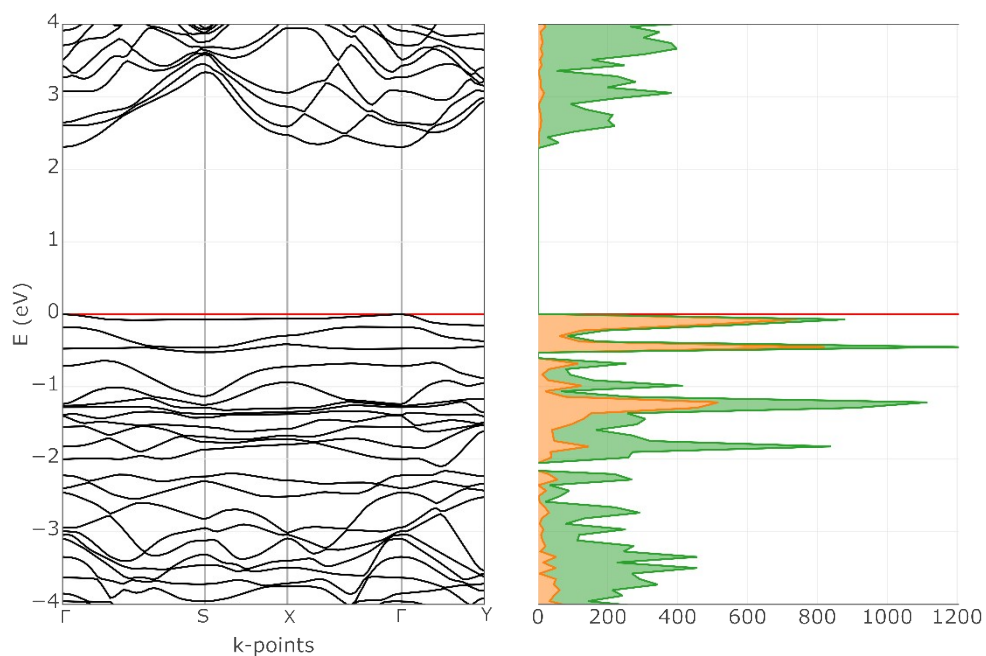

**Figure S3.** Band and DOS structure for the adduct of phosphorene with (CH<sub>3</sub>)<sub>2</sub>Ni fragments. The contribution from the metal fragment is highlighted in orange.

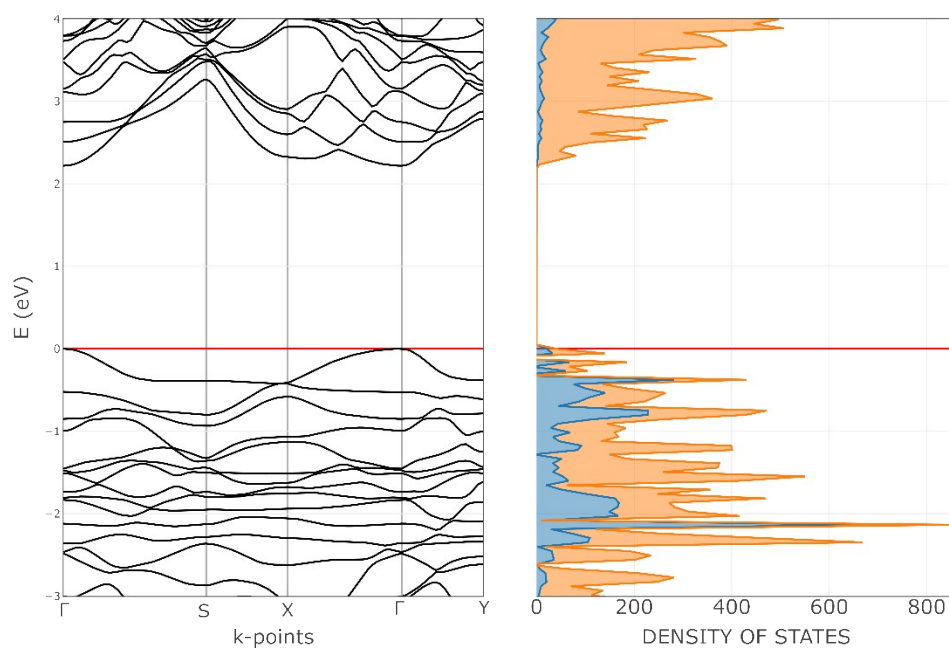

**Figure S4.** Band and DOS structure for the adduct of phosphorene with  $(\text{CO})_2\text{Ni}$  fragments. The contribution from the metal fragment is highlighted in blue.

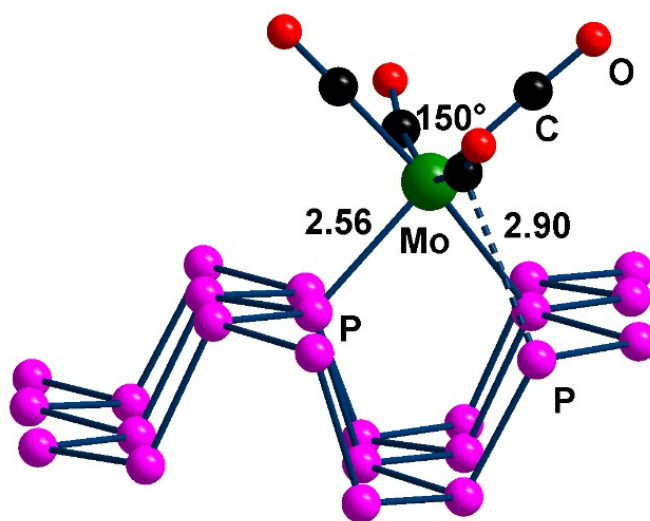

**Figure S5.** Optimized structure of the  $(\text{CO})_4\text{Mo}(\eta^2\text{-P}_n)$  adduct.

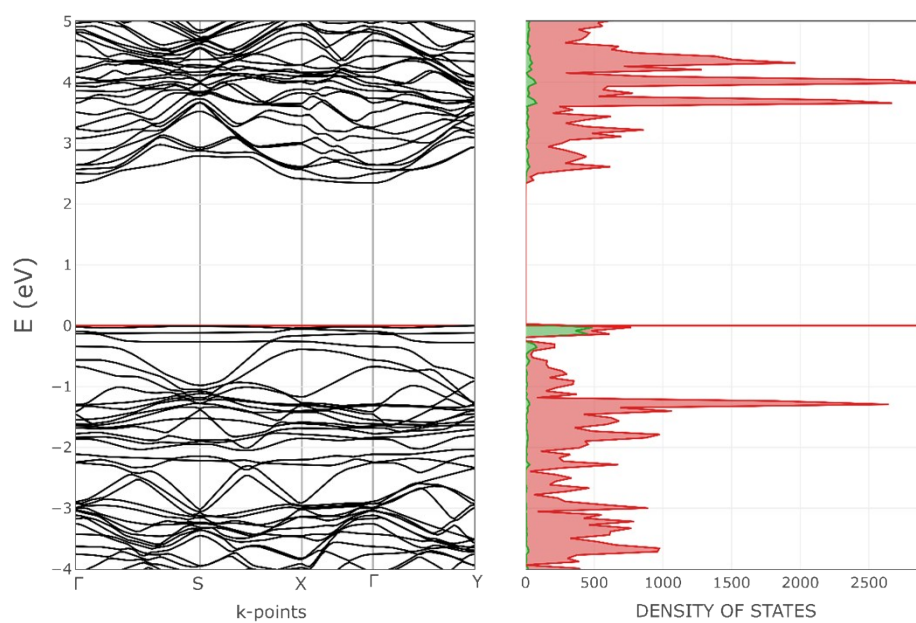

**Figure S6.** Band and DOS structure for the adduct of phosphorene with  $(\text{CO})_3\text{Mo}$  fragments. The contribution from the metal fragment is highlighted in green.

## Geometric and Energy parameters of optimized Structures

### (CH<sub>3</sub>)<sub>3</sub>P

| Sy | X         | Y         | Z         |
|----|-----------|-----------|-----------|
| P  | 0.007911  | -0.498916 | 1.867526  |
| C  | 1.666397  | -1.337860 | 1.926431  |
| H  | 2.285333  | -1.120384 | 1.054730  |
| H  | 2.209058  | -1.025361 | 2.818121  |
| H  | 1.534263  | -2.417442 | 1.991692  |
| C  | -0.507292 | -1.010913 | 0.155717  |
| H  | -1.414184 | -0.480559 | -0.133247 |
| H  | 0.258530  | -0.815393 | -0.596330 |
| H  | -0.738188 | -2.075677 | 0.140331  |
| C  | 0.578668  | 1.229232  | 1.485923  |
| H  | 1.072559  | 1.658054  | 2.357366  |
| H  | 1.270548  | 1.273397  | 0.643543  |
| H  | -0.278904 | 1.861621  | 1.258096  |

Energy: -460.9874835821 Hartrees

### P<sub>3</sub>P

| Sy | X         | Y         | Z         |
|----|-----------|-----------|-----------|
| P  | -0.575122 | 1.881450  | -0.983271 |
| P  | 0.000947  | 0.000112  | 0.098024  |
| C  | -0.602601 | 1.348448  | -2.794600 |
| H  | -1.649337 | 1.373768  | -3.101565 |
| H  | -0.110304 | 2.150178  | -3.348604 |
| C  | 0.000165  | -0.000374 | -3.202170 |
| H  | 0.000129  | -0.000589 | -4.299772 |
| H  | 0.745993  | 2.424824  | -0.965624 |
| P  | -1.342450 | -1.438412 | -0.982688 |
| C  | -0.866576 | -1.196624 | -2.794044 |
| H  | -0.365287 | -2.116006 | -3.100552 |
| H  | -1.807052 | -1.171321 | -3.348014 |
| C  | 1.469707  | -0.152343 | -2.794399 |
| P  | 1.917752  | -0.445010 | -0.983577 |
| H  | 1.721977  | -1.859891 | -0.966714 |
| H  | 2.014123  | 0.742856  | -3.099474 |
| H  | 1.918905  | -0.978330 | -3.349472 |
| H  | -2.470969 | -0.562935 | -0.965184 |

Energy: -1523.603867883 Hartrees

### P<sub>4</sub>

| Sy | X         | Y         | Z         |
|----|-----------|-----------|-----------|
| P  | 0.000001  | -0.000000 | -1.354881 |
| P  | 0.638698  | 1.106254  | 0.451623  |
| P  | 0.638699  | -1.106254 | 0.451623  |
| P  | -1.277388 | 0.000000  | 0.451624  |

Energy: -1365.273533907 Hartrees

**P<sub>n</sub>**

| a      | b      | c      | alpha   | beta    | gamma   |
|--------|--------|--------|---------|---------|---------|
| 6.6993 | 9.4259 | 1.0000 | 90.0000 | 90.0000 | 90.0005 |

| Sy | X | Y | Z |
|----|---|---|---|
|----|---|---|---|

|   |           |           |           |
|---|-----------|-----------|-----------|
| P | 0.208734  | 0.054717  | 1.291381  |
| P | -0.041272 | 0.212801  | 1.290651  |
| P | -0.041226 | 0.304562  | -0.828676 |
| P | 0.208748  | 0.462693  | -0.829171 |
| P | -0.291262 | 0.054721  | 1.291174  |
| P | 0.458741  | 0.212803  | 1.290938  |
| P | 0.458714  | 0.304565  | -0.828434 |
| P | -0.291255 | 0.462630  | -0.829452 |
| P | 0.208737  | -0.445534 | 1.290205  |
| P | -0.041278 | -0.287460 | 1.292008  |
| P | -0.041268 | -0.195405 | -0.826308 |
| P | 0.208747  | -0.037338 | -0.826986 |
| P | -0.291250 | -0.445575 | 1.289761  |
| P | 0.458769  | -0.287470 | 1.292235  |
| P | 0.458739  | -0.195422 | -0.826045 |
| P | -0.291273 | -0.037329 | -0.827043 |

Energy : -5461.168208963 Hartrees

**BH<sub>3</sub>**

| Sy | X | Y | Z |
|----|---|---|---|
|----|---|---|---|

|   |           |           |          |
|---|-----------|-----------|----------|
| B | 0.567328  | 0.202859  | 3.281106 |
| H | 1.705750  | 0.271616  | 2.976713 |
| H | 0.079082  | -0.847936 | 3.506512 |
| H | -0.082960 | 1.184861  | 3.359670 |

Energy: -26.58352205621 Hartrees

**(CH<sub>3</sub>)<sub>3</sub>P·BH<sub>3</sub>**

| Sy | X | Y | Z |
|----|---|---|---|
|----|---|---|---|

|   |           |           |           |
|---|-----------|-----------|-----------|
| P | 0.178940  | -0.551215 | 1.853610  |
| C | 1.817630  | -1.371053 | 1.883783  |
| H | 2.405596  | -1.144869 | 0.995497  |
| H | 2.366500  | -1.046244 | 2.765421  |
| H | 1.680079  | -2.448150 | 1.954075  |
| C | -0.556189 | -1.083039 | 0.261400  |
| H | -1.508121 | -0.576035 | 0.117204  |
| H | 0.094690  | -0.864626 | -0.583917 |
| H | -0.749458 | -2.153386 | 0.293795  |
| C | 0.571436  | 1.219861  | 1.593648  |
| H | 1.090823  | 1.605767  | 2.468471  |
| H | 1.192666  | 1.377123  | 0.713159  |
| H | -0.354052 | 1.780800  | 1.480318  |
| B | -0.914581 | -0.905042 | 3.390386  |
| H | -0.285102 | -0.497337 | 4.329241  |
| H | -1.933692 | -0.296823 | 3.202020  |
| H | -1.068465 | -2.096733 | 3.403389  |

Energy: -487.6303648475 Hartrees

### **P<sub>3</sub>P·BH<sub>3</sub>**

| Sy | X         | Y         | Z         |
|----|-----------|-----------|-----------|
| P  | -1.947940 | -0.457107 | -0.026697 |
| P  | -0.003668 | 0.012567  | 0.953036  |
| C  | -1.360026 | -0.587089 | -1.819014 |
| H  | -1.381621 | -1.649149 | -2.068335 |
| H  | -2.151199 | -0.127032 | -2.414075 |
| C  | -0.000734 | -0.003647 | -2.228475 |
| H  | 0.000451  | -0.009254 | -3.325534 |
| H  | -2.360934 | 0.908850  | -0.062903 |
| P  | 1.371573  | -1.445461 | -0.018471 |
| C  | 1.185180  | -0.885900 | -1.814829 |
| H  | 2.115273  | -0.375920 | -2.070693 |
| H  | 1.180545  | -1.806000 | -2.402363 |
| C  | 0.171164  | 1.467968  | -1.827799 |
| P  | 0.568973  | 1.924009  | -0.036644 |
| H  | 1.958149  | 1.596505  | -0.063421 |
| H  | -0.736769 | 2.015786  | -2.084990 |
| H  | 0.967950  | 1.919554  | -2.421933 |
| B  | -0.006363 | 0.022804  | 2.906586  |
| H  | -0.869036 | 0.804800  | 3.187970  |
| H  | 1.100210  | 0.380834  | 3.193189  |
| H  | -0.251704 | -1.112608 | 3.199022  |
| H  | 0.394225  | -2.485710 | -0.043025 |

Energy: -1550.226763454 Hartrees

### **P<sub>4</sub>BH<sub>3</sub>**

| Sy | X         | Y         | Z         |
|----|-----------|-----------|-----------|
| P  | 0.000203  | -0.000002 | -1.335208 |
| P  | 0.647614  | 1.120424  | 0.418406  |
| P  | 0.647570  | -1.120448 | 0.418410  |
| P  | -1.293040 | 0.000025  | 0.418980  |
| B  | -0.001309 | -0.000000 | -3.421010 |
| H  | -0.588309 | -1.016461 | -3.619894 |
| H  | 1.172228  | 0.000029  | -3.621395 |
| H  | -0.588358 | 1.016433  | -3.619889 |

Energy: -1391.868801377 Hartrees

### **P<sub>n</sub>-0.031(BH<sub>3</sub>)**

| a       | b         | c        | alpha     | beta  | gamma |
|---------|-----------|----------|-----------|-------|-------|
| 13.4151 | 9.4621    | 1.0000   | 90.00     | 90.00 | 90.00 |
| Sy      | X         | Y        | Z         |       |       |
| P       | 0.125019  | 0.051063 | 1.080442  |       |       |
| P       | -0.004078 | 0.200968 | 1.022975  |       |       |
| P       | -0.000062 | 0.284980 | -1.119178 |       |       |
| P       | 0.125019  | 0.442914 | -1.115079 |       |       |



|   |           |           |           |
|---|-----------|-----------|-----------|
| P | -0.125873 | 0.037571  | 1.036605  |
| P | 0.254117  | 0.200968  | 1.022968  |
| P | 0.250101  | 0.284980  | -1.119184 |
| P | -0.125480 | 0.442406  | -1.130338 |
| P | 0.125019  | -0.467399 | 1.009189  |
| P | -0.001015 | -0.311338 | 1.042600  |
| P | 0.000352  | -0.213282 | -1.044939 |
| P | 0.125019  | -0.056931 | -0.968487 |
| P | -0.126031 | -0.467877 | 0.994281  |
| P | 0.251054  | -0.311338 | 1.042599  |
| P | 0.249687  | -0.213281 | -1.044940 |
| P | -0.124653 | -0.056016 | -1.075758 |
| P | -0.374981 | 0.036080  | 1.012943  |
| P | -0.499034 | 0.194486  | 1.005676  |
| P | -0.499628 | 0.284563  | -1.123896 |
| P | -0.374981 | 0.442582  | -1.128360 |
| P | 0.375911  | 0.037571  | 1.036602  |
| P | -0.250927 | 0.194486  | 1.005676  |
| P | -0.250333 | 0.284563  | -1.123895 |
| P | 0.375519  | 0.442406  | -1.130339 |
| P | -0.374981 | -0.465680 | 0.993943  |
| P | 0.499948  | -0.308714 | 1.009561  |
| P | 0.499575  | -0.213960 | -1.097522 |
| P | -0.374981 | -0.056985 | -1.100582 |
| P | 0.376070  | -0.467877 | 0.994280  |
| P | -0.249909 | -0.308714 | 1.009563  |
| P | -0.249536 | -0.213959 | -1.097520 |
| P | 0.374692  | -0.056016 | -1.075761 |
| B | 0.125020  | -0.021478 | 2.965338  |
| H | 0.125024  | 0.091889  | 3.505473  |
| H | 0.200333  | -0.086722 | 3.081567  |
| H | 0.049702  | -0.086711 | 3.081598  |

Energy: -10948.94220513 Hartrees

BAND GAP: 2.32 eV

### **P<sub>n</sub>-0.062(BH<sub>3</sub>)**

| a      | b         | c         | alpha     | beta  | gamma |       |
|--------|-----------|-----------|-----------|-------|-------|-------|
| 6.7089 | 9.5208    | 1.0000    | 90.00     | 90.00 | 90.00 | 90.18 |
| Sy     | X         | Y         | Z         |       |       |       |
| P      | -0.123712 | -0.221765 | 1.036388  |       |       |       |
| P      | -0.379079 | -0.071425 | 0.991614  |       |       |       |
| P      | -0.372426 | 0.011211  | -1.159309 |       |       |       |
| P      | -0.122594 | 0.169016  | -1.162512 |       |       |       |
| P      | 0.375947  | -0.233151 | 1.034017  |       |       |       |
| P      | 0.132942  | -0.071369 | 0.983920  |       |       |       |
| P      | 0.126405  | 0.011552  | -1.165517 |       |       |       |
| P      | 0.377919  | 0.168245  | -1.184071 |       |       |       |
| P      | -0.122356 | 0.258764  | 0.964976  |       |       |       |
| P      | -0.373980 | 0.413547  | 1.017487  |       |       |       |
| P      | -0.373411 | -0.485742 | -1.059724 |       |       |       |
| P      | -0.122803 | -0.330569 | -1.003321 |       |       |       |
| P      | 0.377720  | 0.255950  | 0.943418  |       |       |       |
| P      | 0.130825  | 0.413103  | 1.012138  |       |       |       |

|   |           |           |           |
|---|-----------|-----------|-----------|
| P | 0.127167  | -0.485659 | -1.062797 |
| P | 0.377454  | -0.328758 | -1.070382 |
| B | -0.132747 | -0.298792 | 2.900041  |
| H | -0.098826 | -0.191378 | 3.484639  |
| H | -0.005055 | -0.384700 | 2.966679  |
| H | -0.299389 | -0.341080 | 3.007918  |

Energy: -5487.773073186 Hartrees

BAND GAP: 2.42 eV

**P<sub>n</sub>-0.125(BH<sub>3</sub>)**

|        |        |        |       |       |       |
|--------|--------|--------|-------|-------|-------|
| a      | b      | c      | alpha | beta  | gamma |
| 6.7206 | 9.6149 | 1.0000 | 90.00 | 90.00 | 90.00 |

|    |           |           |           |
|----|-----------|-----------|-----------|
| Sy | X         | Y         | Z         |
| P  | -0.835678 | -2.054964 | 1.064308  |
| P  | -2.542384 | -0.611479 | 1.050036  |
| P  | -2.511315 | 0.270823  | -1.058208 |
| P  | -0.835640 | 1.773834  | -1.060383 |
| P  | 2.524650  | -2.136575 | 1.048883  |
| P  | 0.870995  | -0.611440 | 1.050186  |
| P  | 0.840006  | 0.270765  | -1.058122 |
| P  | 2.524605  | 1.750469  | -0.994579 |
| P  | -0.835659 | 2.672471  | 1.050896  |
| P  | -2.490275 | 4.196750  | 1.049628  |
| P  | -2.519774 | -4.536531 | -1.058926 |
| P  | -0.835921 | -3.056154 | -0.993543 |
| P  | 2.524626  | 2.752246  | 1.062948  |
| P  | 0.818942  | 4.196808  | 1.049780  |
| P  | 0.847797  | -4.536579 | -1.058811 |
| P  | 2.524306  | -3.034270 | -1.062692 |
| B  | -0.833158 | -2.738025 | 2.962803  |
| H  | -0.838272 | -1.652292 | 3.472871  |
| H  | 0.182714  | -3.345812 | 3.068649  |
| H  | -1.842338 | -3.356340 | 3.069806  |
| B  | 2.524150  | 2.070203  | 2.962098  |
| H  | 2.525259  | 3.156437  | 3.471199  |
| H  | -3.184598 | 1.456225  | 3.069193  |
| H  | 1.510830  | 1.458513  | 3.068981  |

Energy: -5514.372894479 Hartrees

BAND GAP: 2.61 eV

**P<sub>n</sub>-0.250(BH<sub>3</sub>)**

|        |           |           |           |       |       |
|--------|-----------|-----------|-----------|-------|-------|
| a      | b         | c         | alpha     | beta  | gamma |
| 6.8391 | 9.8829    | 1.0000    | 90.00     | 90.00 | 89.90 |
| Sy     | X         | Y         | Z         |       |       |
| P      | -0.154067 | -0.211501 | 1.040775  |       |       |
| P      | -0.407176 | -0.062249 | 1.074015  |       |       |
| P      | -0.402981 | 0.031487  | -1.013518 |       |       |
| P      | -0.153768 | 0.182744  | -0.988013 |       |       |
| P      | 0.347284  | -0.213121 | 1.083462  |       |       |

|   |           |           |           |
|---|-----------|-----------|-----------|
| P | 0.097223  | -0.063893 | 1.080555  |
| P | 0.096582  | 0.031744  | -0.999520 |
| P | 0.346609  | 0.181670  | -0.952972 |
| P | -0.154073 | 0.288633  | 1.041952  |
| P | -0.407147 | 0.437971  | 1.073081  |
| P | -0.402983 | -0.468481 | -1.015116 |
| P | -0.153732 | -0.317268 | -0.989797 |
| P | 0.347347  | 0.287126  | 1.083574  |
| P | 0.097237  | 0.436246  | 1.079431  |
| P | 0.096568  | -0.468304 | -1.001488 |
| P | 0.346569  | -0.318314 | -0.954604 |
| B | 0.384293  | -0.265803 | 3.120451  |
| H | 0.261995  | -0.192118 | 3.550997  |
| H | -0.453162 | -0.225961 | 3.229974  |
| H | 0.358745  | -0.384237 | 3.186469  |
| B | 0.384136  | 0.234097  | 3.115979  |
| H | 0.261467  | 0.307155  | 3.551626  |
| H | -0.453562 | 0.274383  | 3.229605  |
| H | 0.359567  | 0.115531  | 3.177769  |
| B | -0.112409 | -0.308645 | 2.755828  |
| H | -0.122618 | -0.217915 | 3.539241  |
| H | 0.049309  | -0.346455 | 2.529970  |
| H | -0.230018 | -0.396042 | 2.826516  |
| B | -0.112824 | 0.191369  | 2.756518  |
| H | -0.122884 | 0.282002  | 3.541022  |
| H | 0.048771  | 0.153271  | 2.531396  |
| H | -0.230798 | 0.104177  | 2.825118  |

Energy: -5567.536066984 Hartrees

BAND GAP: 2.70 eV

## I<sub>2</sub>

| Sy | X         | Y         | Z         |
|----|-----------|-----------|-----------|
| I  | 0.202162  | 0.026931  | -4.488318 |
| I  | -0.196402 | -0.029569 | -7.335169 |

Energy: -22.78406057892 Hartrees

## (CH<sub>3</sub>)<sub>3</sub>P-I<sub>2</sub>

| Sy | X         | Y         | Z         |
|----|-----------|-----------|-----------|
| I  | -3.115248 | -1.180700 | 6.566641  |
| I  | -1.374269 | -0.800576 | 4.060824  |
| P  | 0.198329  | -0.456590 | 1.797345  |
| C  | 1.799721  | -1.345419 | 1.873835  |
| H  | 2.383172  | -1.181324 | 0.967918  |
| H  | 2.368590  | -0.997666 | 2.733102  |
| H  | 1.619448  | -2.411150 | 1.994599  |
| C  | -0.597454 | -1.042685 | 0.253492  |
| H  | -1.529502 | -0.504423 | 0.097081  |
| H  | 0.053953  | -0.888239 | -0.606684 |
| H  | -0.827684 | -2.102006 | 0.341745  |
| C  | 0.640328  | 1.292083  | 1.470125  |

|   |           |          |          |
|---|-----------|----------|----------|
| H | 1.185007  | 1.695464 | 2.320762 |
| H | 1.256964  | 1.380171 | 0.575600 |
| H | -0.266254 | 1.878361 | 1.338314 |

Energy: -483.8076624415 Hartrees

### **P<sub>3</sub>P·I<sub>2</sub>**

| Sy | X         | Y         | Z         |
|----|-----------|-----------|-----------|
| I  | -0.000581 | 0.000339  | 2.884035  |
| I  | -0.007941 | -0.000917 | 5.914146  |
| P  | -0.537402 | 1.933003  | -0.951035 |
| P  | 0.002877  | 0.000644  | 0.028412  |
| C  | -0.625634 | 1.341823  | -2.745718 |
| H  | -1.684883 | 1.335713  | -3.006798 |
| H  | -0.178423 | 2.147508  | -3.331239 |
| C  | -0.000590 | -0.000114 | -3.150539 |
| H  | -0.001642 | -0.000279 | -4.247205 |
| H  | 0.814246  | 2.390933  | -0.965881 |
| P  | -1.400673 | -1.434215 | -0.949160 |
| C  | -0.849769 | -1.212485 | -2.745225 |
| H  | -0.316259 | -2.126732 | -3.009250 |
| H  | -1.772787 | -1.226364 | -3.328172 |
| C  | 1.474614  | -0.129228 | -2.747603 |
| P  | 1.945447  | -0.497614 | -0.952909 |
| H  | 1.668406  | -1.897718 | -0.964405 |
| H  | 1.998445  | 0.790812  | -3.010846 |
| H  | 1.947929  | -0.920279 | -3.332545 |
| H  | -2.475380 | -0.495028 | -0.959763 |

Energy: -1546.411744208 Hartrees

### **P<sub>4</sub>I<sub>2</sub>**

| Sy | X         | Y         | Z         |
|----|-----------|-----------|-----------|
| P  | 0.083320  | 0.008820  | -1.239060 |
| P  | 0.627615  | 1.112631  | 0.583469  |
| P  | 0.628513  | -1.114803 | 0.571038  |
| P  | -1.295957 | -0.001468 | 0.474485  |
| I  | 0.019566  | 0.002169  | -4.430706 |
| I  | -0.063046 | -0.007347 | -7.349236 |

Energy: -1388.062313348 Hartrees

### **P<sub>n</sub>·I<sub>2</sub>**

|    | a         | b         | c         | alpha | beta  | gamma |
|----|-----------|-----------|-----------|-------|-------|-------|
|    | 6.7089    | 9.4285    | 1.0000    | 90.00 | 90.00 | 90.00 |
| Sy | X         | Y         | Z         |       |       |       |
| P  | -0.124845 | -0.239096 | 0.964579  |       |       |       |
| P  | -0.377395 | -0.083592 | 0.974488  |       |       |       |
| P  | -0.374679 | 0.005364  | -1.158897 |       |       |       |
| P  | -0.124839 | 0.163537  | -1.157893 |       |       |       |
| P  | 0.375158  | -0.244129 | 0.978972  |       |       |       |
| P  | 0.127706  | -0.083598 | 0.974430  |       |       |       |

|   |           |           |           |
|---|-----------|-----------|-----------|
| P | 0.125001  | 0.005349  | -1.159035 |
| P | 0.375147  | 0.163305  | -1.163514 |
| P | -0.124829 | 0.255523  | 0.960852  |
| P | -0.375347 | 0.412995  | 0.959545  |
| P | -0.375586 | -0.494069 | -1.154601 |
| P | -0.124839 | -0.337361 | -1.131884 |
| P | 0.375161  | 0.254909  | 0.957595  |
| P | 0.125673  | 0.413004  | 0.959695  |
| P | 0.125909  | -0.494067 | -1.154455 |
| P | 0.375159  | -0.335134 | -1.148575 |
| I | -0.125711 | -0.318607 | 4.023800  |
| I | -0.126945 | -0.365034 | 6.924600  |

Energy: -5483.960609637 Hartrees

### **(CH<sub>3</sub>)<sub>3</sub>P·2I<sub>2</sub>**

| Sy | X         | Y         | Z         |
|----|-----------|-----------|-----------|
| I  | -2.874653 | -1.277010 | 6.734855  |
| I  | -1.017200 | -0.945189 | 4.121240  |
| P  | 0.201431  | -0.480462 | 1.883969  |
| C  | 1.812022  | -1.324087 | 1.731433  |
| H  | 2.271401  | -1.091693 | 0.770938  |
| H  | 2.471133  | -1.000110 | 2.533333  |
| H  | 1.669554  | -2.399101 | 1.811544  |
| C  | -0.829410 | -1.016970 | 0.479571  |
| H  | -1.790225 | -0.509362 | 0.522823  |
| H  | -0.336981 | -0.782229 | -0.463661 |
| H  | -1.001054 | -2.088984 | 0.541120  |
| C  | 0.501308  | 1.305951  | 1.678837  |
| H  | 1.145559  | 1.662707  | 2.478933  |
| H  | 0.974703  | 1.502909  | 0.717374  |
| H  | -0.445222 | 1.838803  | 1.732102  |
| I  | -4.934266 | 0.571235  | 4.935708  |
| I  | -6.607501 | 2.254892  | 3.089180  |

Energy: -506.6112171719 Hartrees

### **P<sub>3</sub>P·2I<sub>2</sub>**

| Sy | X         | Y         | Z         |
|----|-----------|-----------|-----------|
| I  | 0.014373  | -0.348907 | 2.709528  |
| I  | 0.181174  | -0.320788 | 5.838992  |
| P  | -0.396257 | 1.851351  | -0.733377 |
| P  | -0.015602 | -0.206133 | 0.029232  |
| C  | -0.511039 | 1.411846  | -2.571478 |
| H  | -1.565868 | 1.500808  | -2.833945 |
| H  | -0.005109 | 2.231667  | -3.084867 |
| C  | 0.026224  | 0.068554  | -3.085964 |
| H  | 0.040949  | 0.163968  | -4.177908 |
| H  | 0.988308  | 2.192001  | -0.698452 |
| P  | -1.528064 | -1.444944 | -1.039359 |
| C  | -0.911020 | -1.113725 | -2.798751 |
| H  | -0.434054 | -2.038336 | -3.125793 |
| H  | -1.819288 | -1.017747 | -3.396654 |
| C  | 1.484556  | -0.197582 | -2.685450 |

|   |           |           |           |
|---|-----------|-----------|-----------|
| P | 1.906924  | -0.784569 | -0.936395 |
| H | 1.496144  | -2.143346 | -1.085461 |
| H | 2.072009  | 0.707162  | -2.846143 |
| H | 1.915526  | -0.954822 | -3.343102 |
| H | -2.511199 | -0.412583 | -0.980648 |
| I | 2.081961  | 2.419019  | 5.695879  |
| I | 3.777053  | 4.858405  | 5.424613  |

Energy: -1569.211257874 Hartrees

### **P<sub>4</sub>·2I<sub>2</sub>**

| Sy | X         | Y         | Z         |
|----|-----------|-----------|-----------|
| P  | -0.177201 | 0.050723  | -1.057644 |
| P  | 0.234585  | 1.186397  | 0.773515  |
| P  | 0.621369  | -1.010816 | 0.687999  |
| P  | -1.475732 | -0.246842 | 0.685419  |
| I  | -0.111829 | 0.080525  | -4.108214 |
| I  | -0.034824 | 0.092385  | -7.057597 |
| I  | 3.391200  | 0.009980  | -7.767116 |
| I  | 6.221932  | -0.056351 | -8.499862 |

Energy: -1410.852122315 Hartrees

### **P<sub>n</sub>·2I<sub>2</sub>**

| a      | b         | c         | alpha     | beta  | gamma |
|--------|-----------|-----------|-----------|-------|-------|
| 6.7091 | 9.4217    | 1.0000    | 90.00     | 90.00 | 90.00 |
| Sy     | X         | Y         | Z         |       |       |
| P      | -0.126968 | -0.234627 | 0.846713  |       |       |
| P      | -0.379842 | -0.079299 | 0.856504  |       |       |
| P      | -0.376753 | 0.009005  | -1.279673 |       |       |
| P      | -0.126951 | 0.167335  | -1.279940 |       |       |
| P      | 0.373030  | -0.240275 | 0.860838  |       |       |
| P      | 0.125907  | -0.079295 | 0.856593  |       |       |
| P      | 0.122845  | 0.009003  | -1.279582 |       |       |
| P      | 0.373047  | 0.167053  | -1.285557 |       |       |
| P      | -0.126947 | 0.259239  | 0.839038  |       |       |
| P      | -0.377580 | 0.416737  | 0.837515  |       |       |
| P      | -0.377782 | -0.490168 | -1.276104 |       |       |
| P      | -0.126954 | -0.333533 | -1.248275 |       |       |
| P      | 0.373059  | 0.258479  | 0.836041  |       |       |
| P      | 0.123693  | 0.416727  | 0.837499  |       |       |
| P      | 0.123872  | -0.490172 | -1.276094 |       |       |
| P      | 0.373041  | -0.331007 | -1.268670 |       |       |
| I      | -0.126661 | -0.321103 | 3.841289  |       |       |
| I      | -0.126263 | -0.389174 | 6.723944  |       |       |
| I      | -0.127487 | -0.041601 | 8.099701  |       |       |
| I      | -0.127406 | 0.237677  | 9.361917  |       |       |

Energy: -5506.748987016 Hartrees

### **η<sup>1</sup> functionalization**

#### **(CO)<sub>5</sub>Mo(η<sup>1</sup>-P<sub>n</sub>)**

| a       | b      | c      | alpha | beta  | gamma |
|---------|--------|--------|-------|-------|-------|
| 13.4124 | 9.4413 | 1.0000 | 90.00 | 90.00 | 90.04 |

| Sy | X         | Y         | Z         |
|----|-----------|-----------|-----------|
| P  | 0.140381  | 0.090604  | 0.794361  |
| P  | 0.018267  | 0.253698  | 0.833113  |
| P  | 0.014373  | 0.337518  | -1.317623 |
| P  | 0.140119  | 0.494993  | -1.323608 |
| P  | -0.109939 | 0.101476  | 1.038814  |
| P  | 0.265848  | 0.247031  | 0.797789  |
| P  | 0.265552  | 0.338054  | -1.328559 |
| P  | -0.109998 | 0.496536  | -1.341714 |
| P  | 0.141468  | -0.414325 | 0.799045  |
| P  | 0.016587  | -0.257933 | 0.801088  |
| P  | 0.013558  | -0.158583 | -1.270292 |
| P  | 0.139574  | -0.002045 | -1.315134 |
| P  | -0.109439 | -0.414461 | 0.784606  |
| P  | 0.264921  | -0.254078 | 0.800299  |
| P  | 0.264330  | -0.160914 | -1.314881 |
| P  | -0.110069 | -0.002122 | -1.058919 |
| P  | -0.361196 | 0.091213  | 0.781106  |
| P  | -0.486202 | 0.247629  | 0.794380  |
| P  | -0.485317 | 0.339181  | -1.327256 |
| P  | -0.359682 | 0.496119  | -1.310035 |
| P  | 0.389943  | 0.088286  | 0.799978  |
| P  | -0.238713 | 0.252600  | 0.811576  |
| P  | -0.234601 | 0.337726  | -1.331656 |
| P  | 0.389902  | 0.497226  | -1.332326 |
| P  | -0.361200 | -0.414607 | 0.821995  |
| P  | -0.484704 | -0.254269 | 0.809376  |
| P  | -0.484410 | -0.161938 | -1.309431 |
| P  | -0.359397 | -0.003447 | -1.316347 |
| P  | 0.389950  | -0.411365 | 0.791624  |
| P  | -0.235571 | -0.258267 | 0.854428  |
| P  | -0.233478 | -0.159473 | -1.225000 |
| P  | 0.390290  | -0.004144 | -1.317826 |
| Mo | -0.112076 | 0.053410  | 3.642499  |
| C  | -0.141209 | 0.266353  | 3.857692  |
| C  | 0.037025  | 0.092293  | 3.908036  |
| C  | -0.260946 | 0.003801  | 3.771827  |
| C  | -0.116639 | 0.050781  | 5.623334  |
| O  | -0.341097 | -0.028517 | 4.035175  |
| O  | 0.118124  | 0.111701  | 4.230032  |
| O  | -0.119577 | 0.049999  | 6.774949  |
| O  | -0.156202 | 0.382632  | 4.119657  |
| C  | -0.081607 | -0.158352 | 3.760117  |
| O  | -0.064743 | -0.275420 | 3.975215  |

Energy: -11556.42492145 Hartrees

BAND GAP: 2.24 eV

### Cl<sub>2</sub>(CO)Pt( $\eta^1$ -P<sub>n</sub>)

| a       | b         | c        | alpha     | beta  | gamma |
|---------|-----------|----------|-----------|-------|-------|
| 13.4232 | 9.4340    | 1.0000   | 90.00     | 90.00 | 90.07 |
| Sy      | X         | Y        | Z         |       |       |
| P       | 0.124946  | 0.048390 | 1.177129  |       |       |
| P       | -0.004600 | 0.198613 | 1.018324  |       |       |
| P       | 0.001501  | 0.279683 | -1.138964 |       |       |
| P       | 0.126881  | 0.436927 | -1.159835 |       |       |

|    |           |           |           |
|----|-----------|-----------|-----------|
| P  | -0.125899 | 0.034621  | 0.958307  |
| P  | 0.257068  | 0.197096  | 1.030975  |
| P  | 0.249833  | 0.275803  | -1.151394 |
| P  | -0.124386 | 0.436778  | -1.167305 |
| P  | 0.126297  | -0.472747 | 0.962816  |
| P  | 0.000015  | -0.318319 | 0.952760  |
| P  | 0.002067  | -0.216262 | -1.108023 |
| P  | 0.126204  | -0.060489 | -0.895292 |
| P  | -0.126044 | -0.472717 | 0.951606  |
| P  | 0.252054  | -0.315228 | 1.027710  |
| P  | 0.249704  | -0.216967 | -1.062902 |
| P  | -0.123689 | -0.059465 | -1.148556 |
| P  | -0.374275 | 0.029706  | 0.957554  |
| P  | -0.498129 | 0.188108  | 0.963724  |
| P  | -0.499219 | 0.280114  | -1.158888 |
| P  | -0.374654 | 0.439057  | -1.180532 |
| P  | 0.377680  | 0.029233  | 0.961447  |
| P  | -0.251258 | 0.190037  | 0.951654  |
| P  | -0.250284 | 0.280042  | -1.177310 |
| P  | 0.374650  | 0.435726  | -1.144778 |
| P  | -0.374423 | -0.469150 | 0.941553  |
| P  | -0.499501 | -0.311994 | 0.957785  |
| P  | 0.499829  | -0.219277 | -1.164284 |
| P  | -0.374343 | -0.061952 | -1.163676 |
| P  | 0.377084  | -0.472613 | 0.984832  |
| P  | -0.249089 | -0.311919 | 0.953754  |
| P  | -0.248448 | -0.218678 | -1.159721 |
| P  | 0.375281  | -0.059464 | -1.169357 |
| Pt | 0.118301  | -0.032085 | 3.455163  |
| Cl | 0.118063  | -0.094905 | 5.762629  |
| Cl | 0.276175  | 0.074127  | 3.835840  |
| C  | -0.010040 | -0.114569 | 3.572339  |
| O  | -0.085053 | -0.163062 | 3.843220  |

Energy: -12075.33947754 Hartrees

BAND GAP: 2.20 eV

**(CO)<sub>4</sub>Ru( $\eta^1$ -P<sub>n</sub>)**

|    | a         | b         | c         | alpha  | beta  | gamma |
|----|-----------|-----------|-----------|--------|-------|-------|
|    | 13.4128   | 9.4579    |           | 1.0000 | 90.00 | 90.00 |
| Sy | X         | Y         | Z         |        |       |       |
| P  | 0.140331  | 0.091250  | 0.863986  |        |       |       |
| P  | 0.018606  | 0.254384  | 0.864737  |        |       |       |
| P  | 0.014387  | 0.335698  | -1.296001 |        |       |       |
| P  | 0.139598  | 0.493988  | -1.292354 |        |       |       |
| P  | -0.110551 | 0.103989  | 1.073271  |        |       |       |
| P  | 0.265673  | 0.247329  | 0.840300  |        |       |       |
| P  | 0.265016  | 0.337202  | -1.290516 |        |       |       |
| P  | -0.110594 | 0.493764  | -1.313664 |        |       |       |
| P  | 0.140597  | -0.415733 | 0.833573  |        |       |       |
| P  | 0.014950  | -0.260611 | 0.847265  |        |       |       |
| P  | 0.013214  | -0.158845 | -1.215638 |        |       |       |
| P  | 0.139109  | -0.002535 | -1.245653 |        |       |       |
| P  | -0.110563 | -0.416519 | 0.806794  |        |       |       |
| P  | 0.264135  | -0.255718 | 0.844127  |        |       |       |
| P  | 0.263710  | -0.161275 | -1.264151 |        |       |       |



|    |           |           |           |
|----|-----------|-----------|-----------|
| P  | -0.110583 | -0.002824 | -1.010684 |
| P  | -0.361491 | 0.091201  | 0.864393  |
| P  | -0.486848 | 0.247247  | 0.841619  |
| P  | -0.486190 | 0.337153  | -1.289413 |
| P  | -0.360786 | 0.493941  | -1.291434 |
| P  | 0.389386  | 0.088232  | 0.848865  |
| P  | -0.239756 | 0.254364  | 0.865685  |
| P  | -0.235547 | 0.335690  | -1.295169 |
| P  | 0.389427  | 0.495708  | -1.294859 |
| P  | -0.361753 | -0.415776 | 0.834175  |
| P  | -0.485294 | -0.255761 | 0.844660  |
| P  | -0.484846 | -0.161291 | -1.263572 |
| P  | -0.360264 | -0.002552 | -1.245113 |
| P  | 0.389413  | -0.412575 | 0.828117  |
| P  | -0.236137 | -0.260612 | 0.847571  |
| P  | -0.234359 | -0.158859 | -1.215550 |
| P  | 0.389434  | -0.004469 | -1.266894 |
| Ru | -0.110373 | 0.056910  | 3.592528  |
| C  | -0.110611 | 0.265418  | 3.788311  |
| C  | 0.015902  | -0.051772 | 3.644549  |
| C  | -0.236590 | -0.051892 | 3.647198  |
| C  | -0.110096 | 0.049809  | 5.503235  |
| O  | -0.307904 | -0.113912 | 3.891378  |
| O  | 0.087235  | -0.113745 | 3.889135  |
| O  | -0.109878 | 0.046998  | 6.647432  |
| O  | -0.110706 | 0.383801  | 4.044064  |

Energy: -11469.47004206 Hartrees

BAND GAP: 2.22 eV

### ClAu( $\eta^1$ -P<sub>n</sub>)

|    | a         | b         | c         | alpha | beta  | gamma |
|----|-----------|-----------|-----------|-------|-------|-------|
|    | 6.7097    | 9.4863    | 1.0000    | 90.00 | 90.00 | 90.00 |
| Sy | X         | Y         | Z         |       |       |       |
| P  | -0.125047 | -0.211636 | 1.023115  |       |       |       |
| P  | -0.379662 | -0.060024 | 1.103195  |       |       |       |
| P  | -0.373271 | 0.026654  | -1.039439 |       |       |       |
| P  | -0.125029 | 0.185552  | -0.996453 |       |       |       |
| P  | 0.374970  | -0.221397 | 1.146581  |       |       |       |
| P  | 0.129596  | -0.060038 | 1.103435  |       |       |       |
| P  | 0.123195  | 0.026651  | -1.039258 |       |       |       |
| P  | 0.374968  | 0.182683  | -1.086658 |       |       |       |
| P  | -0.125020 | 0.275009  | 1.143044  |       |       |       |
| P  | -0.378205 | 0.430389  | 1.143182  |       |       |       |
| P  | -0.375535 | -0.473729 | -0.964472 |       |       |       |
| P  | -0.125026 | -0.317365 | -1.032774 |       |       |       |
| P  | 0.374975  | 0.270938  | 1.029650  |       |       |       |
| P  | 0.128179  | 0.430389  | 1.143002  |       |       |       |
| P  | 0.125477  | -0.473729 | -0.964642 |       |       |       |
| P  | 0.374975  | -0.316248 | -0.962886 |       |       |       |
| Au | -0.125114 | -0.363922 | 2.740424  |       |       |       |
| Cl | -0.124431 | 0.484426  | 4.567052  |       |       |       |

Energy: -6056.724780848 Hartrees

BAND GAP: 2.17 eV

### ClAu(Me<sub>2</sub>S)

| Sy | X         | Y         | Z         |
|----|-----------|-----------|-----------|
| Au | -0.413990 | 0.050575  | 2.455670  |
| Cl | -1.669732 | -0.143078 | 4.383051  |
| S  | 0.825705  | 0.253113  | 0.571225  |
| C  | -0.272268 | -0.248782 | -0.817281 |
| H  | 0.313201  | -0.292366 | -1.731782 |
| H  | -0.736589 | -1.205715 | -0.603909 |
| H  | -1.037296 | 0.516296  | -0.902552 |
| C  | 1.959998  | -1.195539 | 0.555947  |
| H  | 2.492418  | -1.217037 | -0.391168 |
| H  | 2.660424  | -1.051924 | 1.372411  |
| H  | 1.402029  | -2.112643 | 0.712187  |

Energy: -1073.348460694 Hartrees

### Me<sub>2</sub>S

| Sy | X         | Y         | Z         |
|----|-----------|-----------|-----------|
| S  | 0.007429  | 0.079122  | 0.001573  |
| C  | 1.787953  | -0.087747 | -0.276636 |
| H  | 1.947667  | -0.059194 | -1.353989 |
| H  | 2.334090  | 0.736614  | 0.183290  |
| H  | 2.156203  | -1.038734 | 0.109953  |
| C  | 0.021244  | 0.003453  | 1.809805  |
| H  | 0.600753  | 0.825910  | 2.230608  |
| H  | -1.012388 | 0.094089  | 2.141942  |
| H  | 0.421856  | -0.949310 | 2.157830  |

Energy: -476.9610484976 Hartrees

### ClAu(Me<sub>3</sub>P)

| Sy | X         | Y         | Z         |
|----|-----------|-----------|-----------|
| Au | -0.000007 | -0.000074 | 3.073370  |
| Cl | -0.000136 | -0.000059 | 5.397772  |
| P  | 0.000037  | -0.000067 | 0.846510  |
| C  | 1.654928  | 0.051506  | 0.052523  |
| C  | -0.872015 | 1.407382  | 0.052560  |
| C  | -0.782881 | -1.458958 | 0.052534  |
| H  | 1.578235  | 0.049061  | -1.034347 |
| H  | 2.241366  | -0.809302 | 0.367033  |
| H  | 2.186434  | 0.947301  | 0.366934  |
| H  | -0.832004 | 1.341927  | -1.034310 |
| H  | -0.419312 | 2.345557  | 0.366672  |
| H  | -1.913411 | 1.420218  | 0.367388  |
| H  | -0.746657 | -1.391331 | -1.034339 |
| H  | -1.821576 | -1.536188 | 0.367032  |
| H  | -0.273099 | -2.367272 | 0.366967  |

Energy: -1056.560538467 Hartrees

### $\eta^2$ functionalization

#### (CH<sub>3</sub>)<sub>2</sub>Ni(H<sub>2</sub>O)<sub>2</sub>

| Sy | X        | Y         | Z        |
|----|----------|-----------|----------|
| Ni | 1.065541 | -1.251107 | 2.574141 |

|   |           |           |          |
|---|-----------|-----------|----------|
| C | 0.205445  | -2.348666 | 3.882798 |
| H | 0.782975  | -2.478937 | 4.798134 |
| H | -0.030693 | -3.380217 | 3.551476 |
| H | -0.758805 | -1.925114 | 4.180955 |
| C | 1.643294  | -0.068608 | 3.956125 |
| H | 2.057184  | 0.893333  | 3.593143 |
| H | 2.441240  | -0.512112 | 4.556544 |
| H | 0.848696  | 0.211368  | 4.649791 |
| O | 0.448041  | -2.584401 | 1.087307 |
| H | -0.405205 | -2.343020 | 0.703838 |
| H | 0.254734  | -3.258276 | 1.760191 |
| O | 2.034499  | -0.070104 | 1.190703 |
| H | 2.245890  | 0.678243  | 1.768287 |
| H | 1.585564  | 0.265917  | 0.406666 |

Energy: -1740.841585261 Hartrees

## H<sub>2</sub>O

| Sy | X         | Y         | Z        |
|----|-----------|-----------|----------|
| O  | -0.002857 | -0.094744 | 0.000000 |
| H  | 0.953839  | -0.006054 | 0.000000 |
| H  | -0.350982 | 0.800798  | 0.000000 |

Energy: -76.18811196351 Hartrees

## (CH<sub>3</sub>)<sub>2</sub>Ni(η<sup>2</sup>-P<sub>n</sub>)

| a      | b         | c         | alpha     | beta  | gamma |
|--------|-----------|-----------|-----------|-------|-------|
| 6.7068 | 9.2749    | 1.0000    | 90.00     | 90.00 | 91.06 |
| Sy     | X         | Y         | Z         |       |       |
| P      | 0.268205  | 0.025550  | 1.030056  |       |       |
| P      | 0.029230  | 0.190817  | 1.172739  |       |       |
| P      | 0.027723  | 0.286704  | -0.926013 |       |       |
| P      | 0.283762  | 0.444720  | -0.926262 |       |       |
| P      | -0.220161 | 0.027147  | 1.137179  |       |       |
| P      | -0.471854 | 0.183922  | 1.218286  |       |       |
| P      | -0.470440 | 0.284688  | -0.879611 |       |       |
| P      | -0.218107 | 0.446750  | -0.879651 |       |       |
| P      | 0.282162  | -0.459252 | 1.172189  |       |       |
| P      | 0.043202  | -0.294001 | 1.028207  |       |       |
| P      | 0.029397  | -0.214113 | -1.147892 |       |       |
| P      | 0.282028  | -0.054248 | -1.146859 |       |       |
| P      | -0.216698 | -0.452373 | 1.217926  |       |       |
| P      | -0.468428 | -0.295591 | 1.136973  |       |       |
| P      | -0.470317 | -0.214880 | -1.037966 |       |       |
| P      | -0.218299 | -0.053492 | -1.037834 |       |       |
| Ni     | 0.156286  | -0.134573 | 2.536237  |       |       |
| C      | 0.000662  | -0.223473 | 3.963682  |       |       |
| H      | -0.005593 | -0.154865 | 4.842331  |       |       |
| H      | 0.062598  | -0.326298 | 4.269144  |       |       |
| H      | -0.152104 | -0.243611 | 3.622862  |       |       |
| C      | 0.313157  | -0.047130 | 3.964836  |       |       |
| H      | 0.464367  | -0.023036 | 3.614843  |       |       |
| H      | 0.323950  | -0.118413 | 4.822185  |       |       |
| H      | 0.248270  | 0.053350  | 4.305712  |       |       |

Energy: -7049.186116151 Hartrees

BAND GAP: 2.31 eV

### NH<sub>3</sub>

| Sy | X         | Y         | Z        |
|----|-----------|-----------|----------|
| N  | -0.961247 | -0.567464 | 1.195082 |
| H  | -0.903146 | -1.553919 | 1.430037 |
| H  | -1.892698 | -0.428093 | 0.814789 |
| H  | -0.947008 | -0.070825 | 2.080992 |

Energy: -56.52158650822 Hartrees

### (CO)<sub>2</sub>Ni(NH<sub>3</sub>)<sub>2</sub>

| Sy | X         | Y         | Z         |
|----|-----------|-----------|-----------|
| Ni | 0.302788  | 0.229675  | 0.182882  |
| C  | 1.185086  | 1.267051  | 1.260789  |
| O  | 1.724705  | 2.097641  | 1.870742  |
| C  | -0.460126 | 1.017956  | -1.163655 |
| O  | -0.898605 | 1.701035  | -1.996924 |
| N  | 1.581604  | -1.369896 | -0.519315 |
| H  | 2.089455  | -1.909979 | 0.175236  |
| H  | 2.283230  | -0.851680 | -1.038887 |
| H  | 1.187057  | -2.040287 | -1.172512 |
| N  | -1.156186 | -0.926203 | 1.288842  |
| H  | -0.842096 | -1.424290 | 2.116421  |
| H  | -1.741170 | -1.573524 | 0.768445  |
| H  | -1.775942 | -0.193700 | 1.620338  |

Energy: -1847.954759163 Hartrees

### (CO)<sub>2</sub>Ni(η<sup>2</sup>-P<sub>n</sub>)

| a      | b         | c         | alpha     | beta  | gamma |
|--------|-----------|-----------|-----------|-------|-------|
| 6.7069 | 9.3906    | 1.0000    | 90.00     | 90.00 | 92.01 |
| Sy     | X         | Y         | Z         |       |       |
| P      | 0.284988  | 0.043700  | 0.946785  |       |       |
| P      | 0.047544  | 0.208290  | 0.948106  |       |       |
| P      | 0.048698  | 0.300087  | -1.156658 |       |       |
| P      | 0.305386  | 0.459149  | -1.156385 |       |       |
| P      | -0.207539 | 0.048559  | 0.899163  |       |       |
| P      | -0.452686 | 0.203454  | 1.001136  |       |       |
| P      | -0.452263 | 0.300548  | -1.107485 |       |       |
| P      | -0.193555 | 0.458789  | -1.108491 |       |       |
| P      | 0.306495  | -0.448967 | 0.947933  |       |       |
| P      | 0.069118  | -0.284300 | 0.945889  |       |       |
| P      | 0.050640  | -0.199680 | -1.213520 |       |       |
| P      | 0.303522  | -0.040851 | -1.213199 |       |       |
| P      | -0.193147 | -0.444081 | 0.999856  |       |       |
| P      | -0.438363 | -0.289273 | 0.897471  |       |       |
| P      | -0.451030 | -0.199655 | -1.230463 |       |       |
| P      | -0.194885 | -0.040954 | -1.229294 |       |       |
| Ni     | 0.177364  | -0.120222 | 2.421260  |       |       |
| C      | 0.366409  | -0.184125 | 3.547495  |       |       |
| C      | -0.011909 | -0.056834 | 3.548584  |       |       |

|   |           |           |          |
|---|-----------|-----------|----------|
| O | 0.471205  | -0.218358 | 4.382215 |
| O | -0.116491 | -0.023375 | 4.387200 |

Energy: -7196.086111180 Hartrees

BAND GAP: 2.22 eV

**(CO)<sub>4</sub>Mo((CH<sub>3</sub>)<sub>2</sub>S)<sub>2</sub>**

| Sy | X         | Y         | Z         |
|----|-----------|-----------|-----------|
| Mo | -0.117730 | 0.004382  | -0.207455 |
| C  | -0.283172 | -2.025268 | -0.287517 |
| C  | -2.076062 | 0.093687  | -0.397860 |
| C  | -0.069805 | 0.006772  | -2.176536 |
| O  | -3.223257 | 0.143973  | -0.564696 |
| O  | -0.095013 | 0.012370  | -3.336562 |
| O  | -0.442360 | -3.165651 | -0.383769 |
| C  | -0.092888 | 2.040968  | -0.281016 |
| O  | -0.122770 | 3.190658  | -0.390812 |
| S  | 2.458303  | -0.148153 | -0.233008 |
| C  | 3.187184  | -1.265933 | 1.028924  |
| H  | 2.749076  | -2.247473 | 0.871585  |
| H  | 2.973935  | -0.926014 | 2.039040  |
| H  | 4.262298  | -1.323685 | 0.878712  |
| C  | 3.287993  | 1.407338  | 0.278187  |
| H  | 2.992369  | 2.169781  | -0.435770 |
| H  | 4.365235  | 1.269624  | 0.233033  |
| H  | 2.987108  | 1.711021  | 1.276716  |
| S  | -0.449306 | 0.048815  | 2.351370  |
| C  | 0.752184  | 1.086365  | 3.275097  |
| H  | 0.681213  | 2.090182  | 2.865868  |
| H  | 1.768801  | 0.717068  | 3.167951  |
| H  | 0.475335  | 1.105821  | 4.326212  |
| C  | -0.095582 | -1.558172 | 3.165229  |
| H  | -0.794622 | -2.279099 | 2.752625  |
| H  | -0.265818 | -1.462499 | 4.234465  |
| H  | 0.920853  | -1.888476 | 2.971785  |

Energy: -1476.404684100 Hartrees

**(CO)<sub>4</sub>Mo(η<sup>2</sup>-P<sub>n</sub>)**

| a       | b         | c         | alpha     | beta  | gamma |  |
|---------|-----------|-----------|-----------|-------|-------|--|
| 13.3984 | 9.4275    | 1.0000    | 90.00     | 90.00 | 88.72 |  |
| Sy      | X         | Y         | Z         |       |       |  |
| P       | 0.129091  | 0.052184  | 0.835715  |       |       |  |
| P       | 0.002612  | 0.208376  | 0.942653  |       |       |  |
| P       | 0.001912  | 0.299482  | -1.161578 |       |       |  |
| P       | 0.120626  | 0.464002  | -1.079176 |       |       |  |
| P       | -0.116772 | 0.042591  | 1.042396  |       |       |  |
| P       | 0.250260  | 0.209104  | 0.897673  |       |       |  |
| P       | 0.248818  | 0.307084  | -1.185863 |       |       |  |
| P       | -0.128657 | 0.450732  | -1.161551 |       |       |  |
| P       | 0.123613  | -0.446504 | 1.075634  |       |       |  |
| P       | -0.009943 | -0.292391 | 1.041914  |       |       |  |
| P       | -0.001201 | -0.203525 | -1.104786 |       |       |  |
| P       | 0.122605  | -0.046478 | -1.242610 |       |       |  |
| P       | -0.129325 | -0.458168 | 0.942717  |       |       |  |

|    |           |           |           |
|----|-----------|-----------|-----------|
| P  | 0.248187  | -0.290193 | 0.966884  |
| P  | 0.249860  | -0.204653 | -1.179757 |
| P  | -0.125538 | -0.046262 | -1.104329 |
| P  | -0.374921 | 0.040423  | 0.967533  |
| P  | 0.499022  | 0.201558  | 0.953819  |
| P  | 0.498024  | 0.291666  | -1.171946 |
| P  | -0.375537 | 0.443155  | -1.185276 |
| P  | 0.374479  | 0.046602  | 0.930667  |
| P  | -0.250331 | 0.196718  | 1.076137  |
| P  | -0.247364 | 0.286210  | -1.078758 |
| P  | 0.375263  | 0.458569  | -1.172132 |
| P  | -0.376990 | -0.458874 | 0.898358  |
| P  | 0.498782  | -0.296383 | 0.930925  |
| P  | -0.499622 | -0.203872 | -1.189195 |
| P  | -0.376583 | -0.045131 | -1.179065 |
| P  | 0.374235  | -0.451333 | 0.953650  |
| P  | -0.255807 | -0.301953 | 0.837015  |
| P  | -0.249340 | -0.203312 | -1.241471 |
| P  | 0.372904  | -0.045916 | -1.189427 |
| Mo | -0.063293 | -0.124912 | 2.947201  |
| C  | -0.092432 | 0.024849  | 4.307598  |
| C  | 0.081327  | -0.077456 | 3.398340  |
| C  | -0.207820 | -0.172547 | 3.402028  |
| C  | -0.033774 | -0.274605 | 4.307200  |
| O  | -0.281472 | -0.192657 | 3.958463  |
| O  | 0.155096  | -0.057667 | 3.953113  |
| O  | -0.018863 | -0.362451 | 5.087076  |
| O  | -0.106931 | 0.112839  | 5.087311  |

Energy: -11443.10688342 Hartrees

### $\eta^3$ functionalization

#### (CO)<sub>3</sub>Mo( $\eta^6$ -p-xylene)

| Sy | X         | Y        | Z        |
|----|-----------|----------|----------|
| Mo | 2.383210  | 3.721898 | 3.229509 |
| C  | 3.875617  | 4.539766 | 4.197587 |
| C  | 1.408234  | 5.418617 | 3.341515 |
| O  | 4.764797  | 4.966649 | 4.815040 |
| O  | 0.768584  | 6.385992 | 3.425980 |
| C  | 3.193153  | 4.323575 | 1.551595 |
| C  | 1.987365  | 2.112388 | 4.948441 |
| C  | 1.281929  | 1.884910 | 2.176851 |
| C  | 0.746830  | 2.554092 | 4.479637 |
| H  | 0.036269  | 2.986736 | 5.170983 |
| C  | 2.896607  | 1.552046 | 3.999555 |
| H  | 3.864078  | 1.205815 | 4.337921 |
| C  | 2.553478  | 1.440608 | 2.652884 |
| H  | 3.256475  | 1.008627 | 1.953206 |
| C  | 0.396652  | 2.441234 | 3.104673 |
| H  | -0.573211 | 2.790408 | 2.776881 |
| O  | 3.660027  | 4.616614 | 0.526851 |
| C  | 2.345030  | 2.170177 | 6.402818 |
| H  | 2.139759  | 1.212454 | 6.886907 |
| H  | 1.771122  | 2.934442 | 6.923024 |
| H  | 3.401598  | 2.390010 | 6.544699 |

|   |          |          |          |
|---|----------|----------|----------|
| C | 0.902888 | 1.707035 | 0.737687 |
| H | 0.506158 | 0.703538 | 0.566291 |
| H | 1.760823 | 1.838067 | 0.080785 |
| H | 0.139129 | 2.421502 | 0.436982 |

Energy: -718.1697314172 Hartrees

**p-xylene**

| Sy | X         | Y        | Z        |
|----|-----------|----------|----------|
| C  | 2.051039  | 2.066456 | 4.894473 |
| C  | 1.228314  | 1.859131 | 2.211151 |
| C  | 0.811499  | 2.538723 | 4.486777 |
| H  | 0.151242  | 3.000404 | 5.214453 |
| C  | 2.873685  | 1.491089 | 3.934990 |
| H  | 3.852334  | 1.121134 | 4.224627 |
| C  | 2.470015  | 1.389328 | 2.618470 |
| H  | 3.135889  | 0.940757 | 1.887826 |
| C  | 0.407599  | 2.436985 | 3.169385 |
| H  | -0.565427 | 2.819783 | 2.877287 |
| C  | 2.480165  | 2.150990 | 6.332377 |
| H  | 2.224408  | 1.242303 | 6.883550 |
| H  | 1.998912  | 2.981846 | 6.848112 |
| H  | 3.558388  | 2.283540 | 6.423689 |
| C  | 0.779258  | 1.722511 | 0.783364 |
| H  | 0.305053  | 0.754714 | 0.600730 |
| H  | 1.615912  | 1.800901 | 0.088863 |
| H  | 0.052214  | 2.488706 | 0.514676 |

Energy: -310.7093311416 Hartrees

**(CO)<sub>3</sub>Mo(PMe<sub>3</sub>)**

| Sy | X         | Y         | Z         |
|----|-----------|-----------|-----------|
| Mo | 0.432353  | 0.001056  | -0.006182 |
| C  | 1.615135  | 1.579829  | -0.054462 |
| C  | 1.636105  | -0.741539 | 1.369781  |
| C  | 1.622857  | -0.813607 | -1.352618 |
| O  | 2.355784  | 2.481175  | -0.091037 |
| O  | 2.388383  | -1.157739 | 2.159216  |
| O  | 2.368106  | -1.285161 | -2.117143 |
| P  | -0.895334 | -2.157433 | -0.028002 |
| P  | -0.924603 | 1.092330  | -1.847690 |
| P  | -0.903789 | 1.044207  | 1.877888  |
| C  | -2.711126 | 0.704201  | -2.155873 |
| H  | -3.119350 | 1.303005  | -2.970682 |
| H  | -2.832520 | -0.345895 | -2.417378 |
| H  | -3.300513 | 0.897318  | -1.261226 |
| C  | -0.244644 | 0.862331  | -3.547307 |
| H  | -0.249656 | -0.193214 | -3.812197 |
| H  | -0.815655 | 1.415972  | -4.293086 |
| H  | 0.789187  | 1.199832  | -3.570433 |
| C  | -1.012188 | 2.937955  | -1.782815 |
| H  | -1.526217 | 3.349564  | -2.651711 |
| H  | -1.538047 | 3.263435  | -0.886821 |
| H  | -0.006053 | 3.349150  | -1.741999 |
| C  | -0.190045 | -3.507332 | 1.013245  |
| H  | -0.192412 | -3.211478 | 2.060539  |

|   |           |           |           |
|---|-----------|-----------|-----------|
| H | -0.748836 | -4.437630 | 0.908060  |
| H | 0.844489  | -3.681003 | 0.725406  |
| C | -2.677582 | -2.255789 | 0.473083  |
| H | -3.072917 | -3.265995 | 0.362152  |
| H | -2.796476 | -1.961171 | 1.514652  |
| H | -3.279884 | -1.584158 | -0.136226 |
| C | -0.981204 | -3.021131 | -1.660455 |
| H | -1.478732 | -3.988022 | -1.581138 |
| H | -1.522841 | -2.414803 | -2.384541 |
| H | 0.024737  | -3.173781 | -2.045017 |
| C | -0.971579 | 0.061977  | 3.442851  |
| H | -1.474514 | 0.607546  | 4.241667  |
| H | -1.500655 | -0.875796 | 3.281800  |
| H | 0.038677  | -0.180584 | 3.764695  |
| C | -0.216960 | 2.630289  | 2.523273  |
| H | -0.231693 | 3.388822  | 1.743016  |
| H | -0.777801 | 2.997570  | 3.383103  |
| H | 0.820530  | 2.481471  | 2.814327  |
| C | -2.692743 | 1.504082  | 1.718706  |
| H | -3.089630 | 1.909095  | 2.650167  |
| H | -2.824368 | 2.256329  | 0.942398  |
| H | -3.284975 | 0.632522  | 1.445216  |

Energy: -1790.502757016 Hartrees

**(CO)<sub>3</sub>Mo( $\eta^3$ -P<sub>n</sub>)**

| a       | b         | c         | alpha     | beta  | gamma |
|---------|-----------|-----------|-----------|-------|-------|
| 13.3714 | 9.3750    | 1.0000    | 90.00     | 90.00 | 90.00 |
| Sy      | X         | Y         | Z         |       |       |
| P       | 0.124971  | 0.041051  | 1.031149  |       |       |
| P       | 0.000472  | 0.203214  | 1.096704  |       |       |
| P       | -0.003480 | 0.291376  | -1.041947 |       |       |
| P       | 0.124992  | 0.443815  | -1.229279 |       |       |
| P       | -0.125298 | 0.046014  | 1.068911  |       |       |
| P       | 0.249491  | 0.203192  | 1.096765  |       |       |
| P       | 0.253458  | 0.291371  | -1.041786 |       |       |
| P       | -0.122824 | 0.459850  | -0.944800 |       |       |
| P       | 0.124990  | -0.464752 | 0.861545  |       |       |
| P       | 0.011092  | -0.292816 | 0.988515  |       |       |
| P       | 0.000048  | -0.199762 | -1.137354 |       |       |
| P       | 0.124989  | -0.042273 | -1.159898 |       |       |
| P       | -0.121865 | -0.442824 | 1.183035  |       |       |
| P       | 0.238891  | -0.292813 | 0.988860  |       |       |
| P       | 0.249929  | -0.199756 | -1.137074 |       |       |
| P       | -0.126027 | -0.041818 | -1.065764 |       |       |
| Mo      | 0.124953  | -0.159727 | 2.613836  |       |       |
| C       | 0.124966  | -0.322568 | 3.915526  |       |       |
| O       | 0.125018  | -0.411694 | 4.709429  |       |       |
| C       | 0.230692  | -0.072545 | 3.742990  |       |       |
| O       | 0.289974  | -0.023995 | 4.449756  |       |       |
| C       | 0.019237  | -0.072568 | 3.743543  |       |       |
| O       | -0.040032 | -0.024059 | 4.450715  |       |       |

Energy: -11329.80941363 Hartrees

BAND GAP: 2.34 eV
